# Supplementary material for: Immunosuppression response to the neonicotinoid insecticide thiacloprid in females and males of the red mason bee Osmia bicornis L
Source: PubMed Central journal article supplement (PMC7070012; doi:10.1038/s41598-020-61445-w), 2020-03-13
Supplement: 41598_2020_61445_MOESM1_ESM.pdf [file 41598_2020_61445_MOESM1_ESM.pdf]

**Immunosuppression response to the neonicotinoid insecticide thiacloprid in females and males of the red mason bee *Osmia bicornis* L.**

Annely Brandt<sup>1\*</sup>, Birgitta Hohnheiser<sup>1</sup>, Fabio Sgolastra<sup>2</sup>, Jordi Bosch<sup>3</sup>, Marina Doris Meixner<sup>1</sup>,  
Ralph B uchler<sup>1</sup>

<sup>1</sup>LLH Bee Institute, Erlenstr. 9, 35274 Kirchhain, Germany;

<sup>2</sup>Dipartimento di Scienze e Tecnologie Agro-Alimentari, Universit  di Bologna, Bologna, Italy;

<sup>3</sup>CREAF, Bellaterra 08193, Spain

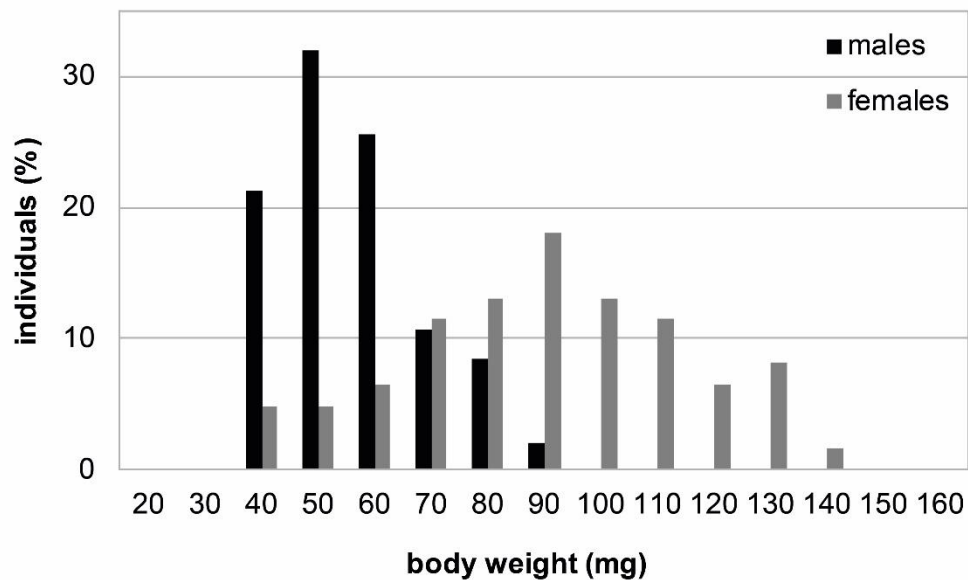

**Suppl. Fig. 1 Body weight of individual bees.** The weight of individual males (n = 269) and females (n = 327) was measured after the immune tests.

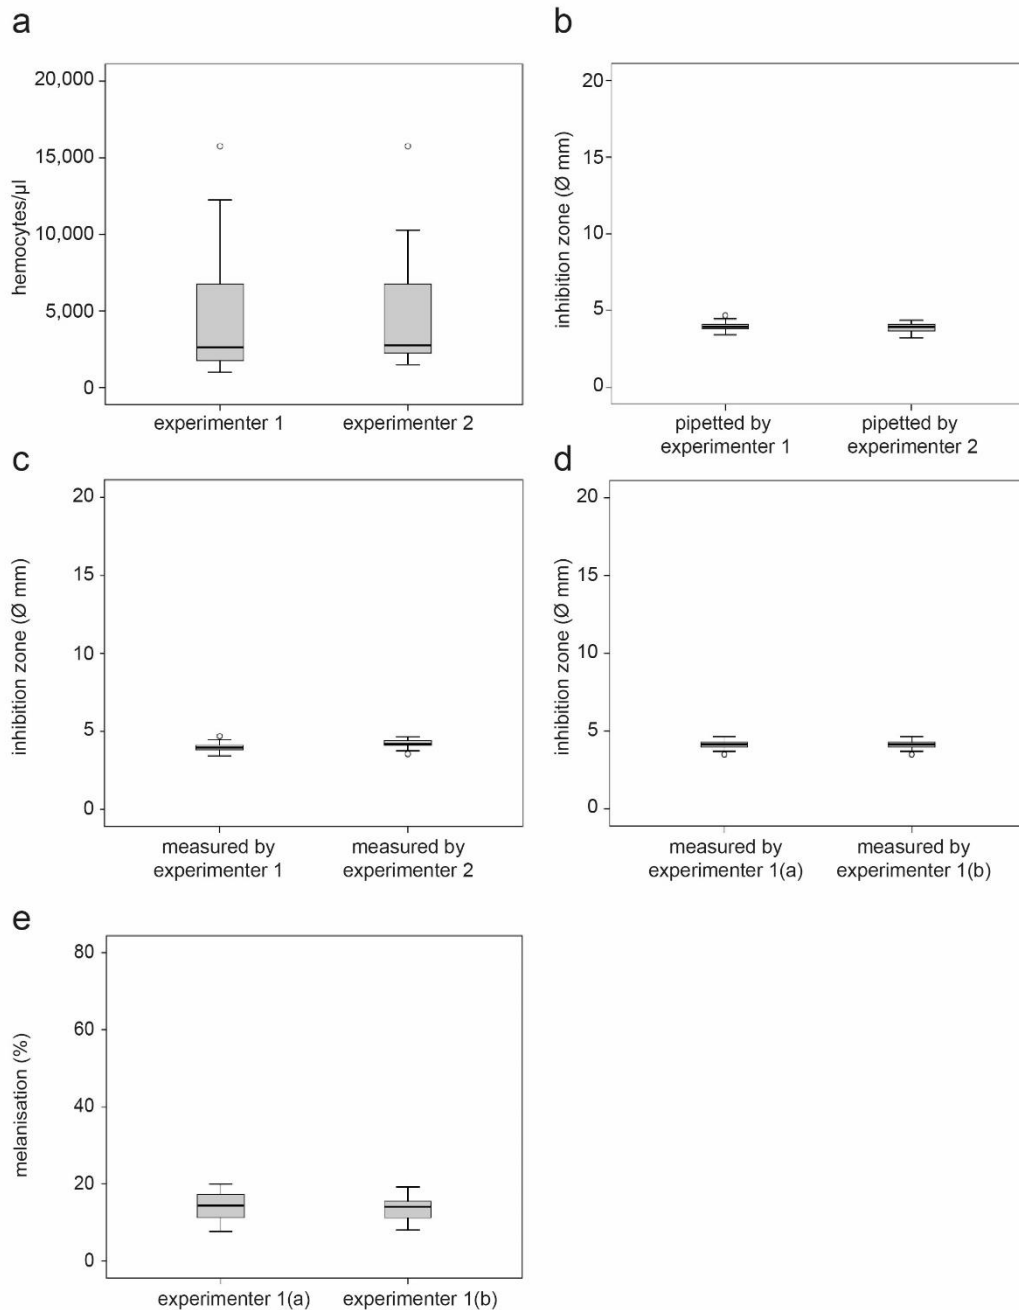

**Suppl. Fig. 2 Methodological repeatability of functional measurements of bee immunity.** (a) The hemocytes of individual *Apis mellifera* worker bee (n = 30) were counted independently by two experimenters (1 and 2). (b) The inhibition zones of 1 μl of a standard lysozyme suspension (1mg /1 ml) were pipetted on the *M. flavus* inoculated petri dishes by 2 experimenters (n = 30 per person), the next day the inhibition zone diameter (mm) was measured with a electronic caliper by experimenter 1. (c) The inhibition zones of 1 μl of a standard lysozyme suspension was pipetted by experimenter 1 (n = 30) and measured with a electric caliper independently by experimenters 1 an 2. (d) The inhibition zones of 1 μl of a standard lysozyme suspension was pipetted by experimenter 1 (n = 30) and measured twice with an electric caliper by experimenter 1. (e) Microscopic pictures of the implanted nylon fibres of *A. mellifera* worker bees were taken independently by experimenter 1 and 2. Whiskers encompass 95% of the individuals, beyond which outliers (circles reside).

**Supplemental Table 1 Experiments were conducted by different persons**

| <b>Assays</b>          | <b>2016</b>         | <b>2018</b> | <b>2019</b> |
|------------------------|---------------------|-------------|-------------|
| hemocyte counts        | BH                  | AB          | AB/BB       |
| melanisation assays    | BH                  | AB          | AB/AB       |
| inhibition zone assays | BH                  | AB          | AB/AB/DB    |
| hemolymph extraction   | SB                  | SB          | AB          |
| BH                     | Birgitta Hohnheiser |             |             |
| AB                     | Annely Brandt       |             |             |
| BB                     | Bastian Barthelmess |             |             |
| DB                     | Dominique Brandt    |             |             |
| SB                     | Sandra Backhaus     |             |             |

**Supplemental Table 2. One-way analysis of variance and calculation of repeatability**

| source of variation                                                               | n  | df | Sum of squares | Mean squares | F ratio | p-value | repeatability (r) |
|-----------------------------------------------------------------------------------|----|----|----------------|--------------|---------|---------|-------------------|
| <b>hemocyte counts</b>                                                            |    |    |                |              |         |         |                   |
| among group                                                                       |    | 1  | 292252.604     | 292252.604   | 0.024   | 0.877   | -0.034            |
| within group                                                                      | 30 |    | 705432942.708  | 12162636.943 |         |         |                   |
| <b>inhibition zone assay (a) pipetted by 2 persons, measured by 1 person</b>      |    |    |                |              |         |         |                   |
| among group                                                                       |    | 1  | 0.78           | 0.078        | 0.935   | 0.338   | 0.25              |
| within group                                                                      | 30 | 58 | 4.826          | 0.083        |         |         |                   |
| <b>inhibition zone assay (b) pipetted by 1 person, measured by 2 persons</b>      |    |    |                |              |         |         |                   |
| among group                                                                       |    | 1  | 0.835          | 0.835        | 10.985  | 0.002   | 0.013             |
| within group                                                                      | 60 | 58 | 4.411          | 0.076        |         |         |                   |
| <b>inhibition zone assay (b) pipetted by 1 person, measured twice by 1 person</b> |    |    |                |              |         |         |                   |
| among group                                                                       | 30 | 1  | 0.000          | 0.000        | 0.006   | 0.937   | -0.034            |
| within group                                                                      |    | 58 | 3.918          | 0.068        |         |         |                   |
| <b>melanisation assay</b>                                                         |    |    |                |              |         |         |                   |
| among group                                                                       |    | 1  | 0.917          | 0.917        | 0.090   | 0.765   | -0.493            |
| within group                                                                      | 30 | 58 | 590.21         | 101.756      |         |         |                   |
